# Supplementary material for: Fano resonance line shapes in the Raman spectra of tubulin and microtubules reveal quantum effects
Source: PubMed Central journal article supplement — Biophys Rep (N Y). 2022 Jan 1;2(1):100043. doi: 10.1016/j.bpr.2021.100043 (PMC9680776; doi:10.1016/j.bpr.2021.100043), 2022-01-01
Supplement: mmc1.pdf [file mmc1.pdf]

**Biophysical Reports, Volume 2**

**Supplemental information**

**Fano resonance line shapes in the Raman spectra of tubulin and micro-tubules reveal quantum effects**

**Wenxu Zhang, Travis J.A. Craddock, Yajuan Li, Mira Swartzlander, Robert R. Alfano, and Lingyan Shi**

**Table S1: Best Model Spectral Fit Parameters for Tubulin in Powdered Form**

| wavenumber (cm-1)  | I0                 | -1/q                | q                  | Gamma              |
|--------------------|--------------------|---------------------|--------------------|--------------------|
| 519.9682331        | 842.5098391        | 0.04077851          | -24.52272042       | 11.34384404        |
| 544.7770152        | 1033.330954        | 0.055522415         | -18.01074395       | 15.10449607        |
| 587.4067025        | 348.0029061        | 0.065338441         | -15.30492593       | 13.72297555        |
| 604.3307658        | 256.591947         | 0.060336249         | -16.57378469       | 10.83170764        |
| 620.634206         | 223.6175945        | 0.061617249         | -16.22922179       | 8.858177257        |
| 636.9806264        | 396.2976762        | 0.06790355          | -14.72677054       | 5.722265454        |
| 675.51271          | 6032.484163        | 0.025663125         | -38.96641582       | 7.136481877        |
| 710.719557         | 1692.238098        | -0.011914456        | 83.93165412        | 6.829705009        |
| 742.1197312        | 288.4670252        | 0.066369074         | -15.06725858       | 8.070812963        |
| <b>833.0286618</b> | <b>1872.192202</b> | <b>-0.164585452</b> | <b>6.075871153</b> | <b>15.10704951</b> |
| 906.2329997        | 22.20252708        | -0.042489076        | 23.53546121        | 1.739186976        |
| 921.5160775        | 305.9177966        | -0.042067726        | 23.7711922         | 7.198725421        |
| 936.5220696        | 342.6630162        | -0.019210234        | 52.05558662        | 7.667886366        |
| 950.160757         | 555.0183554        | 0.009536202         | -104.8635505       | 5.510466445        |
| 1001.703824        | 1092.009718        | -0.033596126        | 29.76533663        | 6.552897308        |
| 1013.95191         | 602.3586817        | -0.038446316        | 26.01029446        | 8.678642131        |
| 1038.689992        | 1793.168195        | -0.047817115        | 20.9130141         | 15.11336412        |
| 1070.104449        | 1232.483808        | -0.036972351        | 27.04723862        | 18.86166008        |
| 1105.332691        | 525.2338607        | -0.01826726         | 54.74274741        | 11.83649458        |
| 1128.643887        | 1212.943529        | -0.012979349        | 77.04546661        | 16.98125217        |
| 1205.824398        | 262.7329802        | -0.038924561        | 25.69072006        | 5.343759472        |
| 1258.553993        | 599.6986452        | -0.025236573        | 39.6250315         | 28.73267759        |
| 1327.553995        | 852.6590456        | -0.007045843        | 141.9276586        | 22.43922218        |
| 1360.731008        | 431.0174794        | 0.008269953         | -120.9196715       | 19.77129775        |
| 1387.016284        | 271.2019552        | 0.014998623         | -66.67278723       | 16.29574227        |
| 1416.510014        | 1228.002581        | 0.021612822         | -46.2688306        | 10.18291729        |
| 1457.493181        | 1430.083862        | 0.086331123         | -11.58330814       | 13.80273412        |

**Table S2: Best Model Spectral Fit Parameters for Tubulin in Solution Form**

| wavenumber (cm-1)  | I0                 | -1/q                | q                   | Gamma              |
|--------------------|--------------------|---------------------|---------------------|--------------------|
| 521.9645279        | 163.8559694        | 0.094519533         | -10.57982375        | 21.98524706        |
| 526.7982729        | 71.05678957        | 0.01941091          | -51.51741984        | 1.000689643        |
| 541.638737         | 100.9468365        | 0.029058758         | -34.41303307        | 7.390725293        |
| 553.711286         | 232.2348967        | 0.06240612          | -16.02406943        | 13.23335634        |
| 564.4843611        | 62.60902648        | 0.019647503         | -50.89705292        | 2.769760606        |
| 578.871516         | 102.2784281        | 0.071506072         | -13.98482635        | 13.02620387        |
| <b>592.6492971</b> | <b>181.8877915</b> | <b>0.105278358</b>  | <b>-9.498628389</b> | <b>17.38309626</b> |
| <b>620.1390477</b> | <b>110.6193643</b> | <b>0.133106571</b>  | <b>-7.512777112</b> | <b>15.19950921</b> |
| <b>639.0658295</b> | <b>117.5304571</b> | <b>0.108472771</b>  | <b>-9.218903424</b> | <b>7.020480729</b> |
| 651.9958218        | 34.88054467        | 0.036316359         | -27.53580005        | 1.001119489        |
| 676.9404998        | 1392.585348        | 0.061333261         | -16.30436705        | 5.90513194         |
| 711.9375545        | 285.0530492        | -0.008693542        | 115.0279138         | 7.763379474        |
| 741.0210073        | 55.06133122        | 0.00630921          | -158.4984491        | 1.405910939        |
| 761.6170659        | 25.88683833        | 0.093621791         | -10.68127398        | 5.486369809        |
| 777.0090221        | 32.77038642        | 0.022691481         | -44.06940208        | 1.010397011        |
| 814.1949965        | 12.20626429        | -0.067568848        | 14.79971954         | 1.135209059        |
| <b>831.5585998</b> | <b>227.401632</b>  | <b>-0.190956233</b> | <b>5.23680209</b>   | <b>13.94116602</b> |
| 876.4460002        | 23.76885567        | 0.073595859         | -13.58772102        | 1.00122416         |
| <b>912.7472872</b> | <b>19.05766561</b> | <b>-0.144391086</b> | <b>6.925635285</b>  | <b>6.375465552</b> |
| <b>927.6642445</b> | <b>88.56629334</b> | <b>-0.137940046</b> | <b>7.249526363</b>  | <b>12.35933481</b> |
| 948.0872382        | 188.415638         | -0.048718786        | 20.52596302         | 8.556597639        |
| 983.7622598        | 36.18504206        | -0.016703803        | 59.86660642         | 4.99377664         |
| <b>1007.351499</b> | <b>316.787056</b>  | <b>-0.113948713</b> | <b>8.775877969</b>  | <b>19.0912025</b>  |
| 1043.332           | 271.7787951        | -0.036540388        | 27.36697815         | 10.03123325        |
| 1068.63307         | 421.4007851        | -0.077804623        | 12.85270671         | 21.97398448        |
| 1085.507043        | 65.85010211        | -0.013711508        | 72.93143832         | 3.554708737        |
| 1100.577343        | 217.7862604        | -0.039744169        | 25.16092361         | 12.39510721        |
| 1110.975897        | 91.98950463        | -0.007392421        | 135.273681          | 1.012795477        |
| 1121.292931        | 55.44577721        | -0.037569596        | 26.61726786         | 12.72167211        |
| 1127.704904        | 245.0192876        | -0.067226229        | 14.87514643         | 22.86769617        |
| 1171.572587        | 26.51144188        | -0.013875199        | 72.0710384          | 3.56433054         |
| 1186.551667        | 33.2214219         | 0.002004392         | -498.9044059        | 3.783129405        |
| 1205.973428        | 38.1045718         | -0.028735002        | 34.80076319         | 5.793634549        |
| 1229.662406        | 54.80227911        | 0.007648917         | -130.7374626        | 1.097800932        |
| 1247.173372        | 47.07070994        | -0.016602827        | 60.23070649         | 14.47818684        |
| 1262.059186        | 46.62525192        | 0.004599444         | -217.4175835        | 1.152445646        |
| 1272.094482        | 58.16831749        | -0.018734607        | 53.37715384         | 11.88975975        |
| 1298.503008        | 10.76867117        | -0.02559719         | 39.06678819         | 18.38950221        |
| 1320.813111        | 48.20391084        | -0.00865858         | 115.4923787         | 4.594779479        |
| 1335.396273        | 137.8327249        | -0.038898885        | 25.70767774         | 31.69947651        |
| 1366.292882        | 49.06270377        | 0.000928321         | -1077.213593        | 1.418991195        |
| 1375.882646        | 48.33394004        | -0.000213088        | 4692.896831         | 2.820790144        |
| 1390.704896        | 50.32051571        | -0.010457643        | 95.62384182         | 12.18220345        |
| 1418.125778        | 260.4861333        | -0.004214625        | 237.2690334         | 9.151470362        |
| 1455.14351         | 196.5719308        | 0.020124676         | -49.69024098        | 9.977267203        |
| 1469.081921        | 48.22370014        | 0.02284172          | -43.77954024        | 4.757268481        |

**Table S3: Best Model Spectral Fit Parameters for Microtubules in Powdered Form**

| wavenumber (cm-1)  | I0                 | -1/q                | q                  | Gamma              |
|--------------------|--------------------|---------------------|--------------------|--------------------|
| 522.0651652        | 3373.956544        | 0.040318464         | -24.80253216       | 11.11603004        |
| 546.5822496        | 3752.007133        | 0.04760544          | -21.00600268       | 13.53084256        |
| 590.5414268        | 1516.814804        | 0.050279233         | -19.8889271        | 12.70314663        |
| 609.0030366        | 982.2566171        | 0.045921531         | -21.77627745       | 9.750977613        |
| 621.2340619        | 649.3304947        | 0.026226697         | -38.12908656       | 4.968827447        |
| 637.6781825        | 1719.983462        | 0.061333739         | -16.30423999       | 7.6732307          |
| 677.3258456        | 23544.84032        | 0.018375787         | -54.41943793       | 6.436003593        |
| 712.6385223        | 5533.610351        | -0.024625096        | 40.60897874        | 6.459398023        |
| 743.9094781        | 1242.869845        | 0.044560286         | -22.44150767       | 9.009602116        |
| <b>834.7641222</b> | <b>6819.473036</b> | <b>-0.137510798</b> | <b>7.272156184</b> | <b>15.14303544</b> |
| 929.2931283        | 1232.67605         | -0.017794722        | 56.19643847        | 11.83833963        |
| 950.5886732        | 1895.795061        | 0.023473121         | -42.60191902       | 6.086725265        |
| 1002.480263        | 3739.986953        | -0.013546061        | 73.8221982         | 4.715320531        |
| 1013.944484        | 2731.86616         | -0.025362507        | 39.42827892        | 9.688156784        |
| 1041.001433        | 6436.483138        | -0.023107665        | 43.27568363        | 13.90460509        |
| 1069.933224        | 4233.645639        | -0.019124357        | 52.28933971        | 18.15239555        |
| 1125.872472        | 4579.690074        | 0.014920587         | -67.02149185       | 23.49022518        |
| 1207.119804        | 1037.628556        | -0.02182023         | 45.82903113        | 6.251082265        |
| 1261.465834        | 2316.152901        | 0.01550493          | -64.49561527       | 32.55975729        |
| 1320.310357        | 1670.473614        | 0.017959153         | -55.68191328       | 13.32048665        |
| 1339.434553        | 1691.1208          | 0.024278785         | -41.18822256       | 16.84028825        |
| 1372.309447        | 1841.751427        | 0.05363778          | -18.64357548       | 27.40693614        |
| 1417.801676        | 3704.255424        | 0.052276684         | -19.12898683       | 10.14526705        |
| <b>1459.11642</b>  | <b>4452.112063</b> | <b>0.105115907</b>  | <b>-9.51330801</b> | <b>14.1762112</b>  |

**Table S4: Best Model Spectral Fit Parameters for Microtubules in Solution Form**

| wavenumber (cm-1)  | I0                 | -1/q                | q                   | Gamma              |
|--------------------|--------------------|---------------------|---------------------|--------------------|
| 520.1883611        | 6204.432166        | 0.040698815         | -24.57073996        | 12.66171233        |
| 544.9380033        | 6657.048878        | 0.047031366         | -21.26240603        | 17.88377405        |
| <b>593.9489569</b> | <b>5176.601787</b> | <b>0.163616713</b>  | <b>-6.111845066</b> | <b>35.1577716</b>  |
| <b>642.5767084</b> | <b>4470.2725</b>   | <b>0.311668154</b>  | <b>-3.208540838</b> | <b>19.8005484</b>  |
| 676.9137529        | 47173.94094        | 0.02661388          | -37.57437848        | 5.89424527         |
| 711.7941487        | 10965.75315        | -0.0202734          | 49.32571744         | 9.06659825         |
| <b>740.1215139</b> | <b>3208.242724</b> | <b>-0.195285443</b> | <b>5.120709381</b>  | <b>20.24072389</b> |
| <b>781.7967939</b> | <b>1515.74358</b>  | <b>-0.12798165</b>  | <b>7.813620156</b>  | <b>41.74407067</b> |
| <b>830.999191</b>  | <b>7785.692657</b> | <b>-0.14955578</b>  | <b>6.68646842</b>   | <b>14.5075804</b>  |
| <b>861.6416749</b> | <b>3218.354258</b> | <b>0.137698558</b>  | <b>-7.262240175</b> | <b>27.66460791</b> |
| 921.030107         | 6097.563595        | -0.052353355        | 19.10097261         | 36.37672734        |
| 951.0984703        | 3291.875611        | 0.089974462         | -11.11426485        | 6.185431822        |
| 1001.615034        | 2836.284763        | -0.024678859        | 40.52051191         | 2.388340833        |
| 1010.298455        | 7640.047873        | -0.004314023        | 231.8021948         | 18.00024574        |
| 1043.42772         | 7927.828394        | 0.00077258          | -1294.364338        | 12.04547945        |
| 1070.734597        | 8409.892754        | -0.014733983        | 67.87031042         | 23.36183829        |
| 1103.669874        | 2201.132739        | -0.021647496        | 46.19471924         | 7.218527631        |
| 1125.899883        | 6945.082615        | -0.073298274        | 13.64288605         | 23.9177208         |
| <b>1206.45793</b>  | <b>1439.755171</b> | <b>0.103453698</b>  | <b>-9.666160025</b> | <b>6.821574547</b> |
| <b>1267.851275</b> | <b>2623.452544</b> | <b>0.20584533</b>   | <b>-4.858016453</b> | <b>35.72003289</b> |
| 1323.769107        | 2759.818044        | -0.05755087         | 17.37593194         | 20.19304577        |
| <b>1373.881839</b> | <b>2998.74537</b>  | <b>0.189721313</b>  | <b>-5.270889096</b> | <b>49.99999996</b> |
| 1418.295679        | 6508.33869         | 0.087300814         | -11.45464692        | 8.350317449        |
| <b>1458.108093</b> | <b>5951.711826</b> | <b>0.120574267</b>  | <b>-8.293643618</b> | <b>16.8774971</b>  |
